# Supplementary material for: Degradable self-adhesive epidermal sensors prepared from conductive nanocomposite hydrogel
Source: Royal Society of Chemistry journal article supplement (doi:10.1039/d0nr04666c), 2020-01-01
Supplement: d0nr04666c3.pdf [file d0nr04666c3.pdf]

1

## Supporting Information

# 2 Degradable Self-Adhesive Epidermal Sensors Prepared from 3 Conductive Nanocomposite Hydrogel

4 *Zhiang Shao, Xiangming Hu\*, Weimin Cheng\*, Yanyun Zhao, Jiaoyun Hou, Mingyue Wu, Di*  
5 *Xue, and Yuhao Wang*

6 College of Safety and Environmental Engineering, Shandong University of Science and  
7 Technology Qingdao, Shandong 266590, China

8

9 \*Corresponding E-mail:

10 [xiangming0727@163.com](mailto:xiangming0727@163.com)

11 [wmcheng@sdust.edu.cn](mailto:wmcheng@sdust.edu.cn)

## 1 **Scanning Electron Microscope (SEM) of the freeze-dried hydrogel**

2 In order to verify the hydrogel's structure, the hydrogel was first freeze-dried (-80 °C)  
3 overnight to remove excess moisture while its original three-dimensional network structure  
4 was maintained. Then, the freeze-dried specimens were broken apart, and the inner  
5 morphology of the various hydrogels was observed by SEM (JSM 6390, JEOL, Japan). It can  
6 be seen from Figure S3a and c that the conductive hydrogels has more smaller pore size and  
7 thicker pore wall structure than PAM hydrogel, indicating that the supramolecular interactions  
8 between Fe<sup>3+</sup>, CNF, PDA and PAM is beneficial to promote the association of polymer chains,  
9 thereby increasing the mechanical properties of the hydrogel. It can be seen from Figure S3b  
10 and d that micro-fibril structure appear in the pores of the conductive hydrogel, but they do  
11 not appear in the pure PAM hydrogel. The microfibrils are nanostructures formed by the  
12 supramolecular interaction between the polymer chains PAM-PDA-CNF and Fe<sup>3+</sup>, which are  
13 beneficial to increase the conductivity of the hydrogel.

## 14 **Detailed FTIR characterization of the conductive hydrogels**

15 In order to verify the hydrogen bonding among PAM, CNF and PDA, and metal coordination  
16 between PDA/CNF and Fe<sup>3+</sup>, FTIR spectra of PAM, PAM-CNF, PAM-CNF-Fe<sup>3+</sup>, and PAM-  
17 PDA, PAM-PDA-CNF, and PAM-CNF-PDA-Fe<sup>3+</sup> gels were characterized using FTIR  
18 spectroscopy analyzer. As shown in Figure S5, PAM displayed characteristic peaks at 3183,  
19 2954, 2855, 1634, 1174, and 1123 cm<sup>-1</sup>, which can be attributed to the stretching vibration of  
20 N-H bond of secondary amine, the anti-symmetric and symmetric stretching vibrations of C-H  
21 bond of methylene group, the stretching vibration of C=O bond of amide group, and the anti-  
22 symmetric and symmetric stretching vibrations of C-N bond of amide group, respectively.  
23 After CNF was introduced, there was a clear red-shift for the antisymmetric stretching  
24 vibration peak of C-N bond (1173.25 cm<sup>-1</sup>) of PAM-CNF, indicating that there was a strong  
25 hydrogen bonding between CNF and PAM. PAM-CNF had a wider peak of -OH in -COOH at

1 3420.87  $\text{cm}^{-1}$  and a stretching vibration peak of C=O at 1667.09  $\text{cm}^{-1}$  respectively. After  $\text{Fe}^{3+}$   
2 was added, the hydroxyl peak of PAM-CNF- $\text{Fe}^{3+}$  (3419.23  $\text{cm}^{-1}$ ) red-shifted and clearly  
3 became stronger. The peak of C=O of PAM-CNF- $\text{Fe}^{3+}$  (1664.82  $\text{cm}^{-1}$ ) also underwent a red  
4 shift, indicating that the carboxyl group changed from the original association state to the  
5 chelation state with  $\text{Fe}^{3+}$ . PAM-PDA showed a wide phenolic hydroxyl peak at the 3422.88  
6  $\text{cm}^{-1}$  and a stretching vibration peak of phenolic carbonyl group at 1666.46  $\text{cm}^{-1}$ . After the  
7 addition of CNF, the carbonyl peak of PAM-CNF-PDA (1655.41 $\text{cm}^{-1}$ ) showed a red shift,  
8 indicating that there was strong hydrogen bonding between PDA and CNF. After addition of  
9  $\text{Fe}^{3+}$ , the hydroxyl peak intensity of PAM-CNF-PDA- $\text{Fe}^{3+}$  was higher than that of PAM-PDA  
10 and exhibited a significantly red shift, indicating that the original catechol group converted  
11 from  $\pi - \pi$  conjugation to chelate with  $\text{Fe}^{3+}$ . Compared with that of PAM-CNF-PDA, the  
12 carbonyl peak of PAM-CNF-PDA- $\text{Fe}^{3+}$  was slightly intensified, probably, because the  
13 oxidation of DA by  $\text{Fe}^{3+}$  increased the carbonyl content of the system.

#### 14 **Rheological characterization of the conductive hydrogels**

15 Figure S7 (a-c) show the variations in storage modulus  $G'$  and loss modulus  $G''$  of the  
16 conductive hydrogels over the angular frequency ranging from 0.01 to 100  $\text{rad s}^{-1}$ . The tested  
17 conductive hydrogel samples had different DA contents (1‰, 2‰, and 4‰ wt/AM), different  
18  $\text{Fe}^{3+}$  contents ( $c_{\text{Fe}^{3+}}:c_{\text{DA}} = 0.5, 1, \text{ and } 2$ ) and different CNF contents (0.25%, 0.375%, and  
19 0.5% wt/water) and were tested under a constant strain ( $\lambda = 1.0\%$ , linear interval). For  
20 determining the linear viscoelastic region, the conductive hydrogels was first subjected to  
21 scan test with varying strain amplitudes (0.01~100%).<sup>[1]</sup> As shown in Figure S6a, as the DA  
22 content increased from 1‰ to 2‰, the storage modulus of the conductive hydrogels increased  
23 significantly, indicating that the proper amount of DA can enhance the content of crosslinked  
24 structure in the conductive hydrogels. As the content of DA further increased to 4‰, the the  
25 conductive hydrogels's storage modulus decreased as DA can weaken the activity of APS and

1 then block the free radical polymerization in the gel system.<sup>[2]</sup> Therefore, when the DA  
2 content was 2%, the conductive hydrogels could obtain better enhancing effect. Fe<sup>3+</sup> also  
3 exhibited similar situation with DA. As shown in Figure S6b, as the molar ratio of Fe<sup>3+</sup> to DA  
4 increased from 0.5 to 1, the storage modulus of the conductive hydrogels increased  
5 significantly, indicating that in addition to chelating with DA, the remaining Fe<sup>3+</sup> could  
6 continue to chelate with CNF, thereby, enhancing the strength of gel (it is generally  
7 considered that a stable tris-catechol-Fe<sup>3+</sup> complexes can easily form when the molar ratio  
8 between Fe<sup>3+</sup> and DA is about 1:3).<sup>[3]</sup> As the molar ratio of Fe<sup>3+</sup> to DA increased to 2, the  
9 storage modulus of the conductive hydrogels contrarily decreased, primarily, because the  
10 excessive Fe<sup>3+</sup> may have over-oxidized DA; thereby, reducing the content of catechol group  
11 in the conductive hydrogels, and then, weakening the crosslinking structure in the conductive  
12 hydrogels. As shown in Figure S7c, the storage modulus increased as the CNF content in the  
13 system increased. Compared with the case containing higher CNF concentration (0.5 wt%),  
14 when the CNF contents were 0.25% and 0.375%, the storage modulus became extremely low,  
15 and the loss modulus and storage modulus became very close. The variation in moduli  
16 indicates that the conductive hydrogels had low crosslink density and a tendency of  
17 converting to sol, which indirectly indicates that CNF are the main physically-crosslinked  
18 sites of the conductive hydrogels.

### 19 **Gel permeation chromatography (GPC) characterization of gel solution**

20 In the section, two PS Mix (250×7 mm, dp = 5 μm) and two PS-1 (250 × 7 mm, dp = 5 μm)  
21 columns were adopted. Water was used as the mobile phase, RID 7490 as refractive index  
22 detector, and UV diode-array detector were used in series. All the samples were separated at  
23 20°C. The flowrate of mobile phase was 2 ml/min and the injected volume of sample was 100  
24 μL. Before entering columns, the solution was filtered through a 0.45 μm PTFE membrane.  
25 For determining the molecular weight, a calibration curve was drawn by using standard

1 polyacrylamide samples with known molecular weights (218,000, 85,600, 40,000, 20,000,  
2 8,000, 6,000, 4,000, and 1,000 Da). In order to accurately reflect the molecular weight change  
3 of polymer in the solution with time, a standard curve was drawn by measuring the gel  
4 solution (50 mg/ml) after degradation at different times (0 day, 7 days, 14 days, and 30 days).  
5 Various molecular-weight parameters of the gel solution are listed in Table S4. A GPC  
6 molecular-weight distribution calibration curve [ $\log M = f(V_e)$ ] was drawn based on the data  
7 in Table S5 (Figure S10). The eight points on the calibration curve represent polyacrylamide  
8 with molecular weights of 218000, 85600, 40,000, 20,000, 8000, 6000, 4000, and 1000 Da  
9 and water (18 Da), respectively.

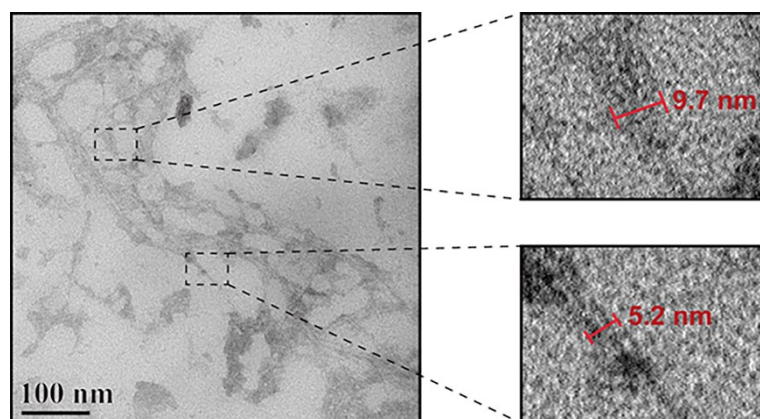

**Figure S1.** TEM images of CNF.

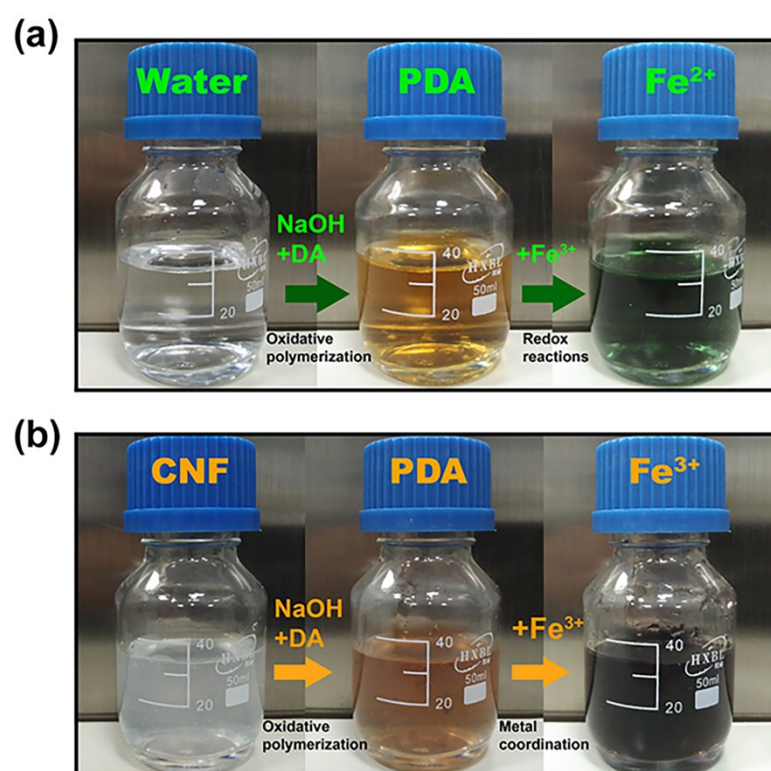

**Figure S2.** The color variation when  $\text{Fe}^{3+}$  co-existed with DA (a) in water and (b) in CNF solution.

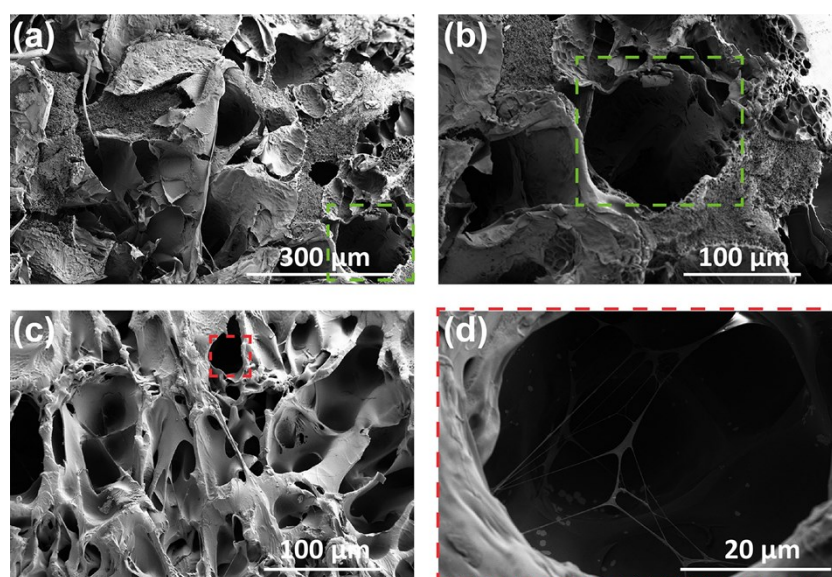

**Figure S3.** SEM images of (a-b) the PAM hydrogel, (c) the conductive hydrogels, and (d) microfibrils embedded in the the conductive hydrogels.

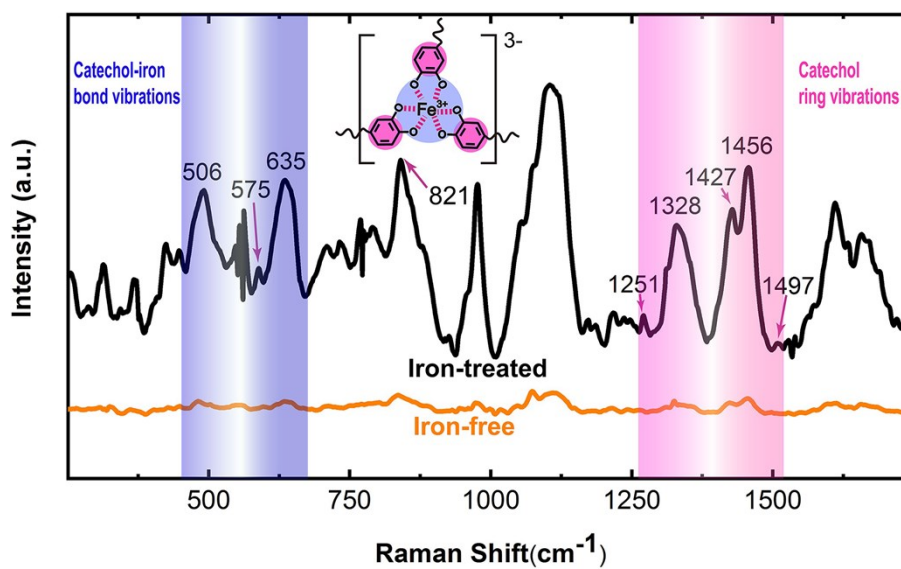

**Figure S4.** Raman spectra of the conductive hydrogels with Fe<sup>3+</sup> (black curve) and without Fe<sup>3+</sup> (orange curve).

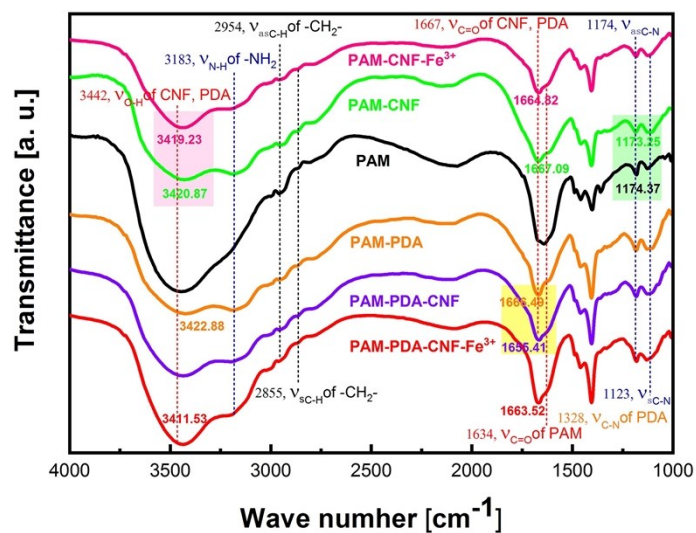

**Figure S5.** FTIR spectra of the freeze-dried conductive hydrogels with different components.

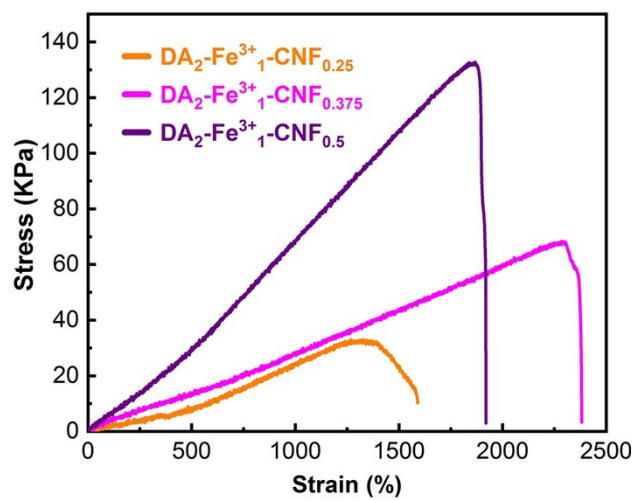

**Figure S6.** Tensile stress-strain curves of the conductive hydrogels with different content of CNF.



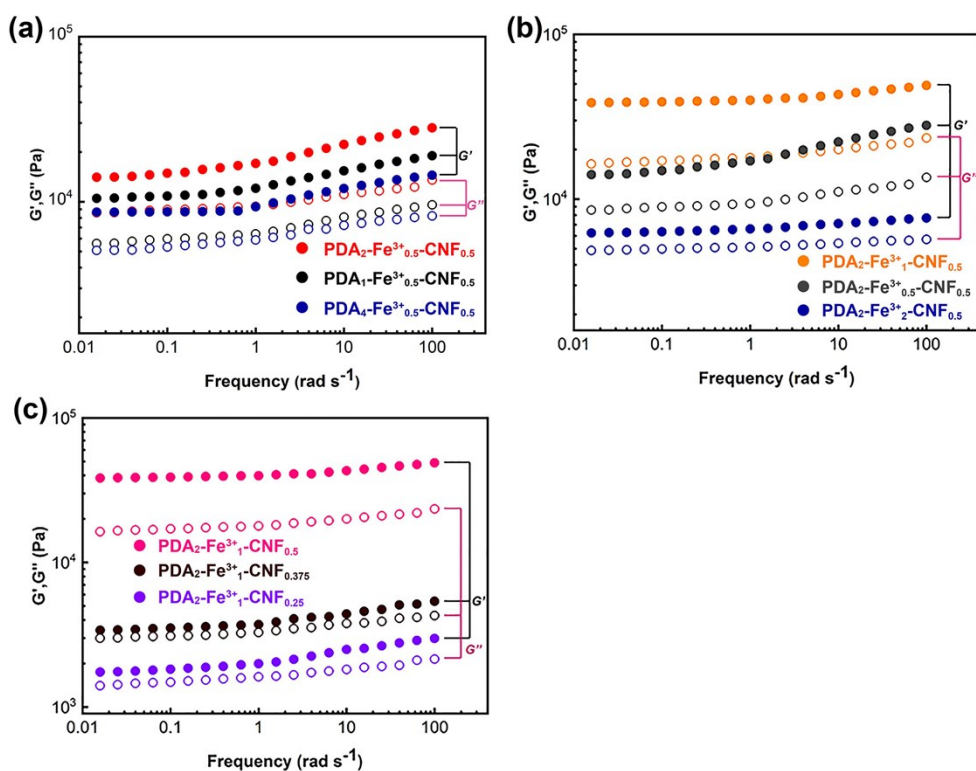

**Figure S7.** Storage modulus  $G'$  and loss modulus  $G''$  of the conductive hydrogels with different DA contents (a),  $c_{\text{Fe}^{3+}}:c_{\text{DA}}$  (b) and CNF contents (c).

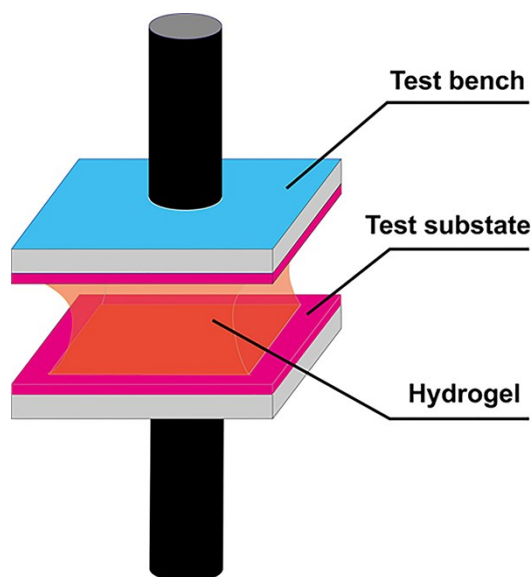

**Figure S8.** Diagram of device to measure the self-adhesive performance.

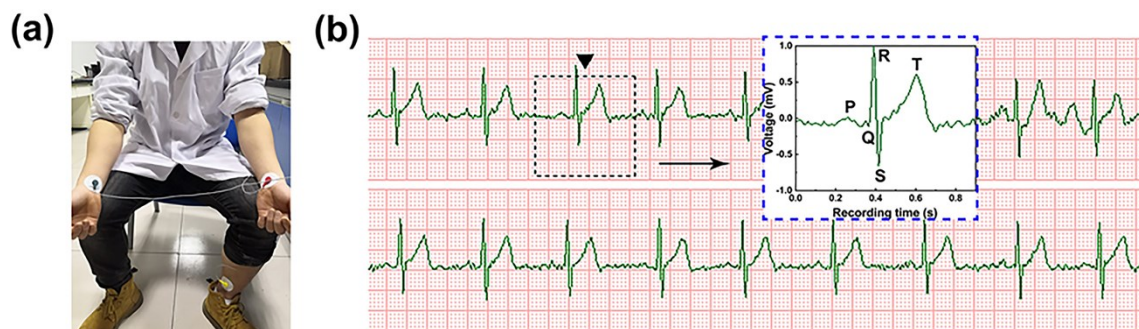

**Figure S9.** (a) Ag-AgCl commercial electrode adhered to arteries of human limbs; (b) Ag-AgCl commercial electrode to measure the ECG of human body.

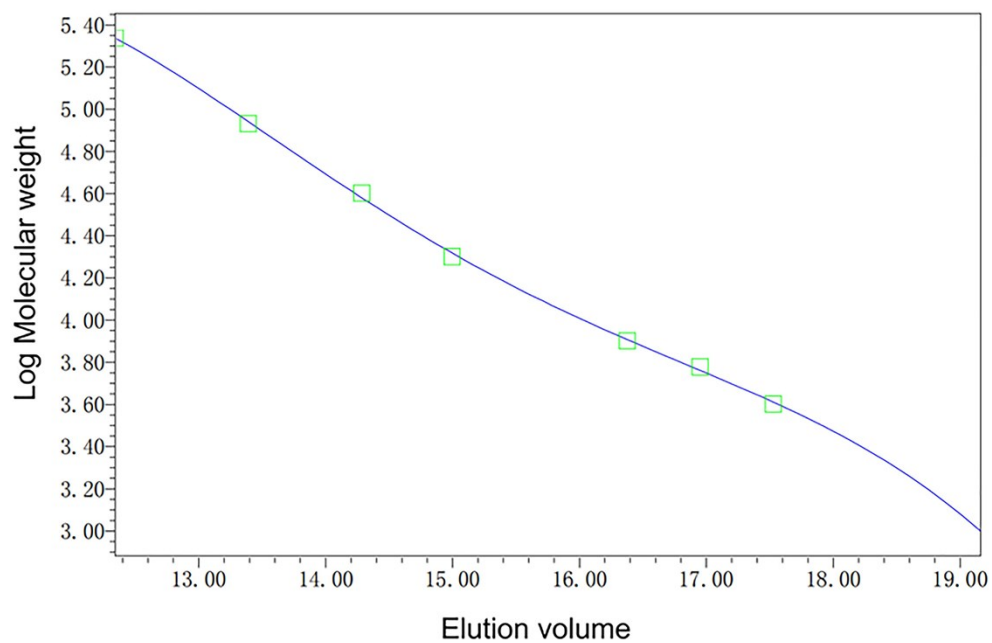

**Figure S10.** GPC calibration curve of the conductive hydrogels polymer solutions.

**Table S1.** Composition of the conductive hydrogels with different DA contents.

| code                                                                 | CNF/water (wt%) | CNF solution (ml) | DA (mg) | FeCl <sub>3</sub> (mg) | AM (g) | APS (g) | TEMED (μl) | MBA (mg) |
|----------------------------------------------------------------------|-----------------|-------------------|---------|------------------------|--------|---------|------------|----------|
| DA <sub>0</sub> -Fe <sup>3+</sup> <sub>0.5</sub> -CNF <sub>0.5</sub> | 0.5             | 20                | 0       | 4                      | 5.5    | 0.6     | 40         | 10       |
| DA <sub>1</sub> -Fe <sup>3+</sup> <sub>0.5</sub> -CNF <sub>0.5</sub> | 0.5             | 20                | 6       | 4                      | 5.5    | 0.6     | 40         | 0        |
| DA <sub>2</sub> -Fe <sup>3+</sup> <sub>0.5</sub> -CNF <sub>0.5</sub> | 0.5             | 20                | 12      | 8                      | 5.5    | 0.6     | 40         | 0        |
| DA <sub>4</sub> -Fe <sup>3+</sup> <sub>0.5</sub> -CNF <sub>0.5</sub> | 0.5             | 20                | 24      | 16                     | 5.5    | 0.6     | 40         | 0        |

According to different amounts of DA, Fe<sup>3+</sup> and CNF, the prepared conductive hydrogels were termed as DA<sub>x</sub>-Fe<sup>3+</sup><sub>y</sub>-CNF<sub>z</sub>, where x, y, and z refer to the mass percentage of DA to AM (x), the molar concentration ratio between Fe<sup>3+</sup> and DA, and the mass percentage of CNF to water (z%).

**Table S2.** Composition of the conductive hydrogels with different Fe<sup>3+</sup> contents.

| code                                                                 | CNF/water (wt%) | CNF solution (ml) | DA (mg) | FeCl <sub>3</sub> (mg) | AM (g) | APS (g) | TEMED (μl) |
|----------------------------------------------------------------------|-----------------|-------------------|---------|------------------------|--------|---------|------------|
| DA <sub>2</sub> -Fe <sup>3+</sup> <sub>0.5</sub> -CNF <sub>0.5</sub> | 0.5             | 20                | 12      | 8                      | 5.5    | 0.6     | 40         |
| DA <sub>2</sub> -Fe <sup>3+</sup> <sub>1</sub> -CNF <sub>0.5</sub>   | 0.5             | 20                | 12      | 16                     | 5.5    | 0.6     | 40         |
| DA <sub>2</sub> -Fe <sup>3+</sup> <sub>1.5</sub> -CNF <sub>0.5</sub> | 0.5             | 20                | 12      | 24                     | 5.5    | 0.6     | 40         |
| DA <sub>2</sub> -Fe <sup>3+</sup> <sub>2</sub> -CNF <sub>0.5</sub>   | 0.5             | 20                | 12      | 32                     | 5.5    | 0.6     | 40         |

1 **Table S3.** Composition of the conductive hydrogels with different CNF contents.

| code                                                                 | CNF/water (wt%) | CNF solution (ml) | DA (mg) | FeCl <sub>3</sub> (mg) | AM (g) | APS (g) | TEMED (μl) | MBA (mg) |
|----------------------------------------------------------------------|-----------------|-------------------|---------|------------------------|--------|---------|------------|----------|
| DA <sub>2</sub> -Fe <sup>3+</sup> <sub>1</sub> -CNF <sub>0</sub>     | 0               | 20                | 12      | 16                     | 5.5    | 0.6     | 40         | 10       |
| DA <sub>2</sub> -Fe <sup>3+</sup> <sub>1</sub> -CNF <sub>0.25</sub>  | 0.25            | 20                | 12      | 16                     | 5.5    | 0.6     | 40         | 0        |
| DA <sub>2</sub> -Fe <sup>3+</sup> <sub>1</sub> -CNF <sub>0.375</sub> | 0.375           | 20                | 12      | 16                     | 5.5    | 0.6     | 40         | 0        |
| DA <sub>2</sub> -Fe <sup>3+</sup> <sub>1</sub> -CNF <sub>0.5</sub>   | 0.5             | 20                | 12      | 16                     | 5.5    | 0.6     | 40         | 0        |

2

3

4

5 **Table S4.** GPC measuring index and results of gel solutions.

|                 | Mn (Da) | Mw (Da) | MP (Da) | Mz (Da) | Mz+1 (Da) | Polydispersity |
|-----------------|---------|---------|---------|---------|-----------|----------------|
| <b>Original</b> | 73300   | 117853  | 211200  | 147381  | 163973    | 1.607814       |
| <b>7 day</b>    | 36252   | 83021   | 154921  | 127688  | 153113    | 2.290110       |
| <b>14 day</b>   | 24759   | 62125   | 100207  | 108938  | 140300    | 2.509215       |
| <b>30 day</b>   | 1335    | 1361    | 1338    | 1338    | 1416      | 1.019698       |

6

7

8

1 **Table S5.** Calibration curves of gel solutions.

|          | <b>Molecular weight<br/>(Da)</b> | <b>Retention time<br/>(min)</b> | <b>Calculated weight<br/>(Da)</b> | <b>Residual<br/>(%)</b> |
|----------|----------------------------------|---------------------------------|-----------------------------------|-------------------------|
| <b>1</b> | 218000                           | 12.358                          | 217271                            | 0.335                   |
| <b>2</b> | 40000                            | 14.288                          | 38025                             | 5.194                   |
| <b>3</b> | 8000                             | 16.397                          | 8099                              | -1.219                  |
| <b>4</b> | 4000                             | 17.554                          | 4092                              | -2.256                  |
| <b>5</b> | 85600                            | 13.391                          | 87488                             | -2.158                  |
| <b>6</b> | 20000                            | 15.007                          | 20793                             | -3.814                  |
| <b>7</b> | 6000                             | 16.982                          | 5761                              | 4.145                   |
| <b>8</b> | 1000                             | 19.179                          | 999                               | 0.118                   |

2

3 **Reference:**

4 [1] Q. G. Wang, J. L. Mynar, M. Yoshida, E. Lee, M. Lee, K. Okuro, K. Kinbara, T. Aida,  
5 *Nature*, **2010**,463 , 339.

6 [2] L. Han, L. W. Yan, K. F. Wang, L. M. Fang, H. P. Zhang, Y. H. Tang, Y. H. Ding, L. T.  
7 Weng, J. L. Xu, J. Weng, Y. J. Liu, F. Z. Ren, X. Lu, *NPG Asia Mater* 9, e372 (**2017**)  
8 doi:10.1038/am.2017.33.

9 [3] S. Hou, P. X. Ma, *Chem Mater.* **2015**, 27, 7627.
